# Supplementary material for: Chemiluminescence Immunoassay Based Serological Immunoassays for Detection of SARS-CoV-2 Neutralizing Antibodies in COVID-19 Convalescent Patients and Vaccinated Population
Source: MDPI journal article supplement (doi:10.3390/v13081508), 2021-07-30
Supplement: s1 [file s1]

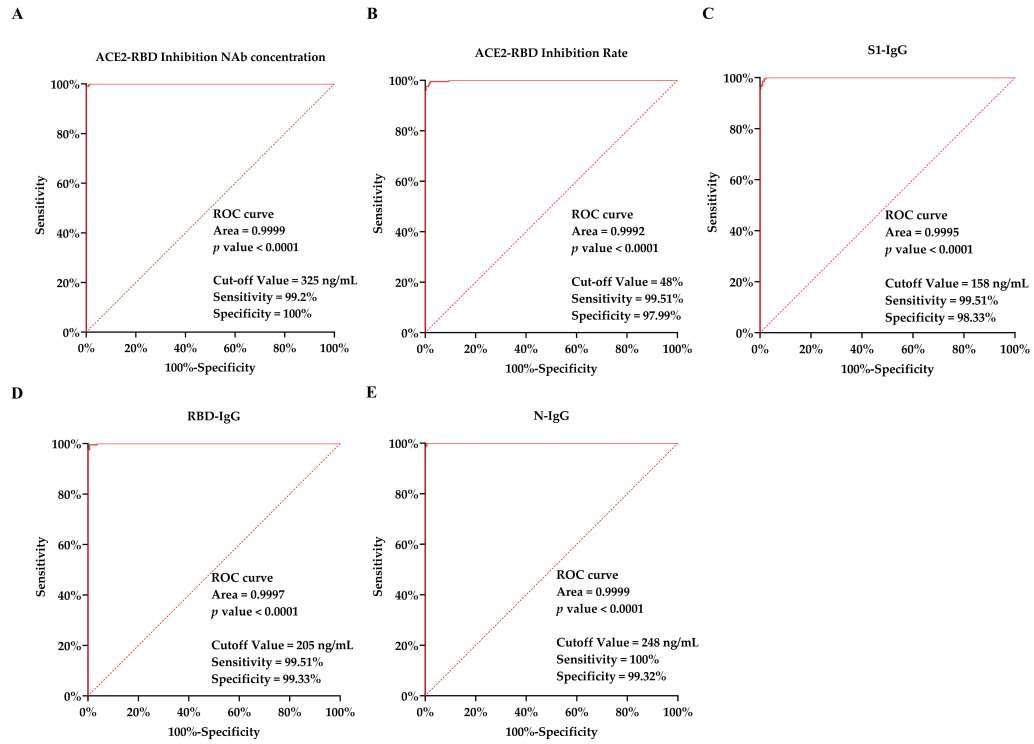

**Figure S1.** The analysis of a receiver operating characteristic (ROC) curve based on positive divided by negative (P/N) values

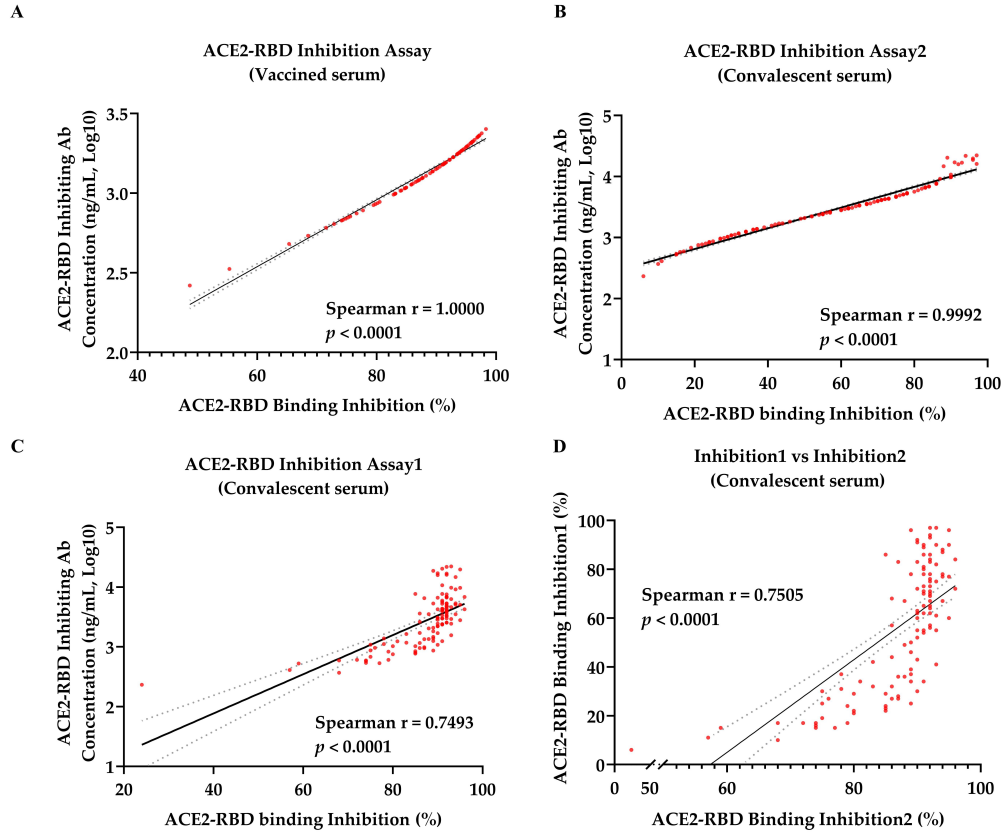

**Figure S2.** Correlation of ACE2-RBD binding Inhibition and ACE2-RBD-Inhibiting antibody concentration. **(A)** Correlation of ACE2-RBD binding Inhibition and ACE2-RBD-Inhibiting antibody concentration of 86 vaccinated samples before dilution; **(B)** Correlation of ACE2-RBD binding Inhibition and ACE2-RBD-Inhibiting antibody concentration of 119 convalescent samples after dilution; **(C)** Correlation of ACE2-RBD binding inhibition and ACE2-RBD-inhibiting antibody concentration of 119 convalescent samples before dilution; **(D)** Correlation of ACE2-RBD binding inhibition before dilution and ACE2-RBD binding inhibition after dilution of 119 convalescent samples.

**Table S1.** The level of neutralization antibody in randomly collected sera from COVID-19 convalescent patients or vaccinated donors

| Neutralization antibody titer | COVID-19 convalescent patients | Vaccinated population |
|-------------------------------|--------------------------------|-----------------------|
| <1:10                         | 5.88% (7/119)                  | 0% (0/86)             |
| 1:10-1:160                    | 42.86% (51/119)                | 58.14% (50/86)        |
| 1:160-1:500                   | 32.77% (39/119)                | 30.23%(26/86)         |
| >1:500                        | 18.49%(22/119)                 | 11.63%(10/86)         |

**Table S2.** The analysis of a receiver operating characteristic (ROC) curve based on positive divided by negative (P/N) values

| ROC curve                  |                        | Cutoff value | Sensitivity% (95% CI) | Specificity%(95% CI) |
|----------------------------|------------------------|--------------|-----------------------|----------------------|
| ACE2 -RBD Inhibition Assay | Antibody concentration | 325ng/mL     | 99.02 (96.51-99.83)   | 100(98.73-100.0)     |
|                            | Inhibition             | 48.00%       | 99.51(97.29-99.97)    | 97.99(95.69-99.08)   |
|                            | S1-IgG concentration   | 158ng/mL     | 99.51(97.29-99.97)    | 98.33(96.15-99.28)   |
| Specific IgG Detection     | RBD-IgG concentration  | 205ng/mL     | 99.51(97.29-99.97)    | 99.33(97.59-99.88)   |
|                            | N-IgG concentration    | 248ng/mL     | 100(98.16-100.0)      | 99.32(97.54-99.88)   |

**Table S3.** Comparison of Chemiluminescence Immunoassays and Microneutralization Test Results

|                  |   | MNT    |        | Sum |
|------------------|---|--------|--------|-----|
|                  |   | +      | -      |     |
| ACE2-RBD binding | + | 197(A) | 13(B)  | 209 |
| Inhibition Assay | - | 1(C)   | 293(D) | 301 |
| Sum              |   | 198    | 306    | 504 |

  

|                     |   | MNT    |        | Sum |
|---------------------|---|--------|--------|-----|
|                     |   | +      | -      |     |
| ACE2-RBD Inhibiting | + | 196(A) | 13(B)  | 210 |
| antibody Assay      | - | 2(C)   | 293(D) | 294 |
| Sum                 |   | 198    | 306    | 504 |

  

|                  |   | MNT    |        | Sum |
|------------------|---|--------|--------|-----|
|                  |   | +      | -      |     |
| S1-IgG Detection | + | 197(A) | 12(B)  | 209 |
| Method           | - | 1(C)   | 294(D) | 295 |
| Sum              |   | 198    | 306    | 504 |

  

|                   |   | MNT    |        | Sum |
|-------------------|---|--------|--------|-----|
|                   |   | +      | -      |     |
| RBD-IgG Detection | + | 197(A) | 9(B)   | 206 |
| Method            | - | 1(C)   | 297(D) | 298 |
| Sum               |   | 198    | 306    | 504 |

  

|                 |   | MNT    |        | Sum |
|-----------------|---|--------|--------|-----|
|                 |   | +      | -      |     |
| N-IgG Detection | + | 198(A) | 15(B)  | 213 |
| Method          | - | 0(C)   | 291(D) | 291 |
| Sum             |   | 198    | 306    | 504 |

\*Sensitivity=A/(A+C)×100%, Specificity=D/(B+D)×100%.
